# Supplementary material for: Myosin X is a downstream effector of PI(3)K during phagocytosis
Source: Springer Nature journal article supplement (doi:10.1038/ncb805), 2002-06-11
Supplement: 41556_2002_BFncb805_MOESM1_ESM.pdf [file 41556_2002_BFncb805_MOESM1_ESM.pdf]

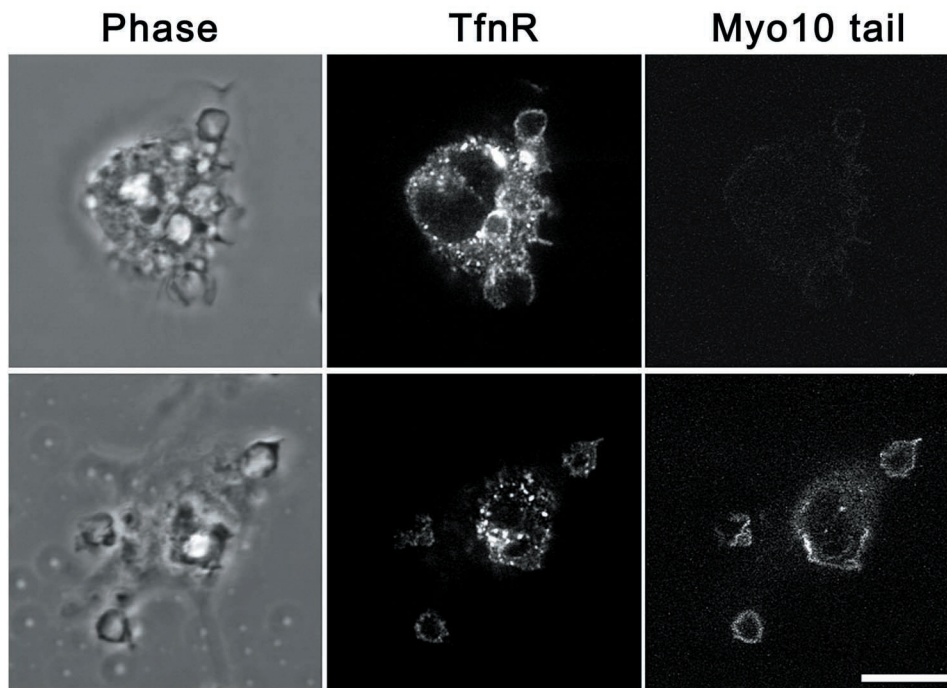

Figure 1 **Expression of Myo10 tail does not inhibit transferrin receptor recruitment to phagocytic cups.** Adherent RAW LR5 cells, transfected with Myo10 tail, were incubated with ElgG for 15 min at 4°C to allow binding but not

ingestion, then incubated at 37°C for 2 min. Cells were fixed and stained for transferrin receptors with mAb C2 followed by biotin-conjugated anti rat IgG and rhodamine-streptavidin. Scale bar = 10  $\mu$ m.

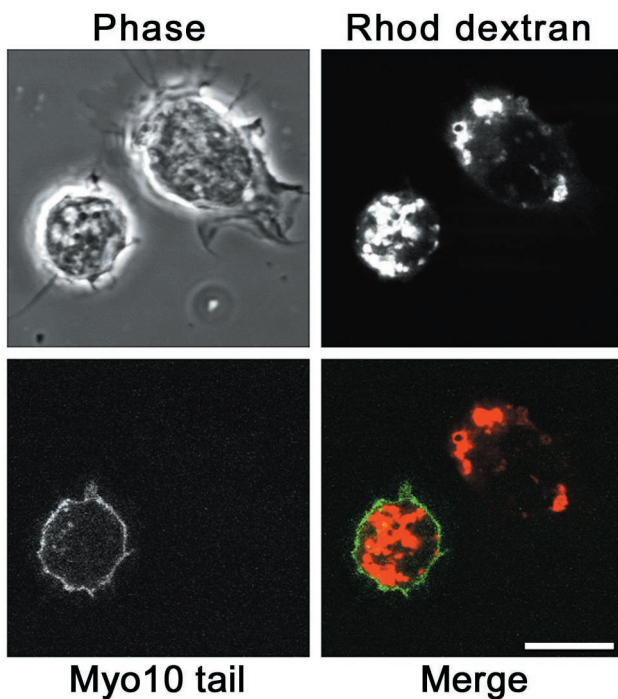

Figure 2 **Expression of Myo10 tail does not inhibit macropinocytosis.** RAW LR5 cells, transfected with Myo10 tail, were incubated in 5 mg/ml rhodamine dextran for 1 hour at 37°C, washed, and allowed to recover in suspension for 1 hour. Cells were then plated on coverslips, fixed and then imaged. Scale bar = 10  $\mu$ m.
